# Supplementary figures and images for: Mechanosensing in actin stress fibers revealed by a close correlation between force and protein localization
Source: Oxford University Press journal article supplement (doi:10.1242/jcs.042986), 2009-04-28

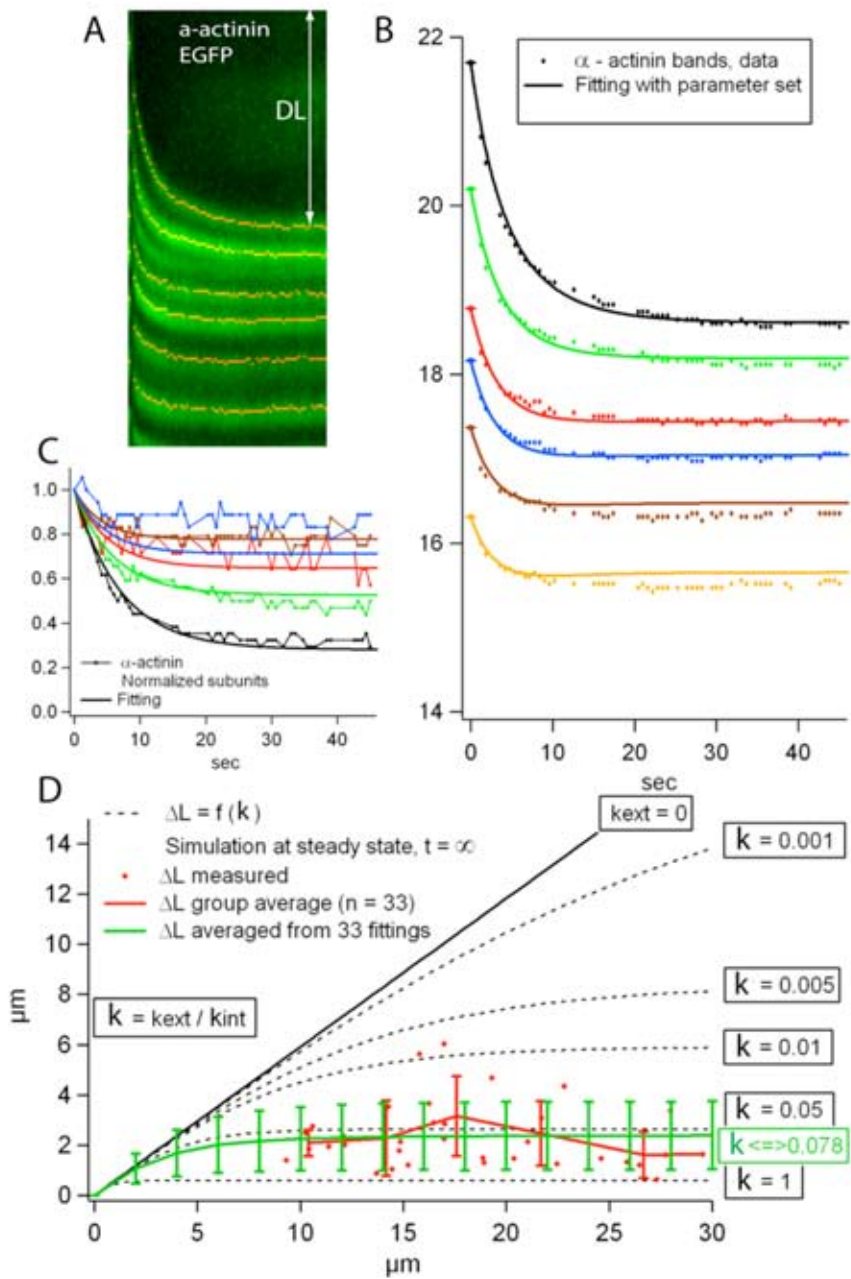

Supplement: jcs042986-sup-042986-figs1.pdf [file jcs042986-sup-042986-figs1.pdf]

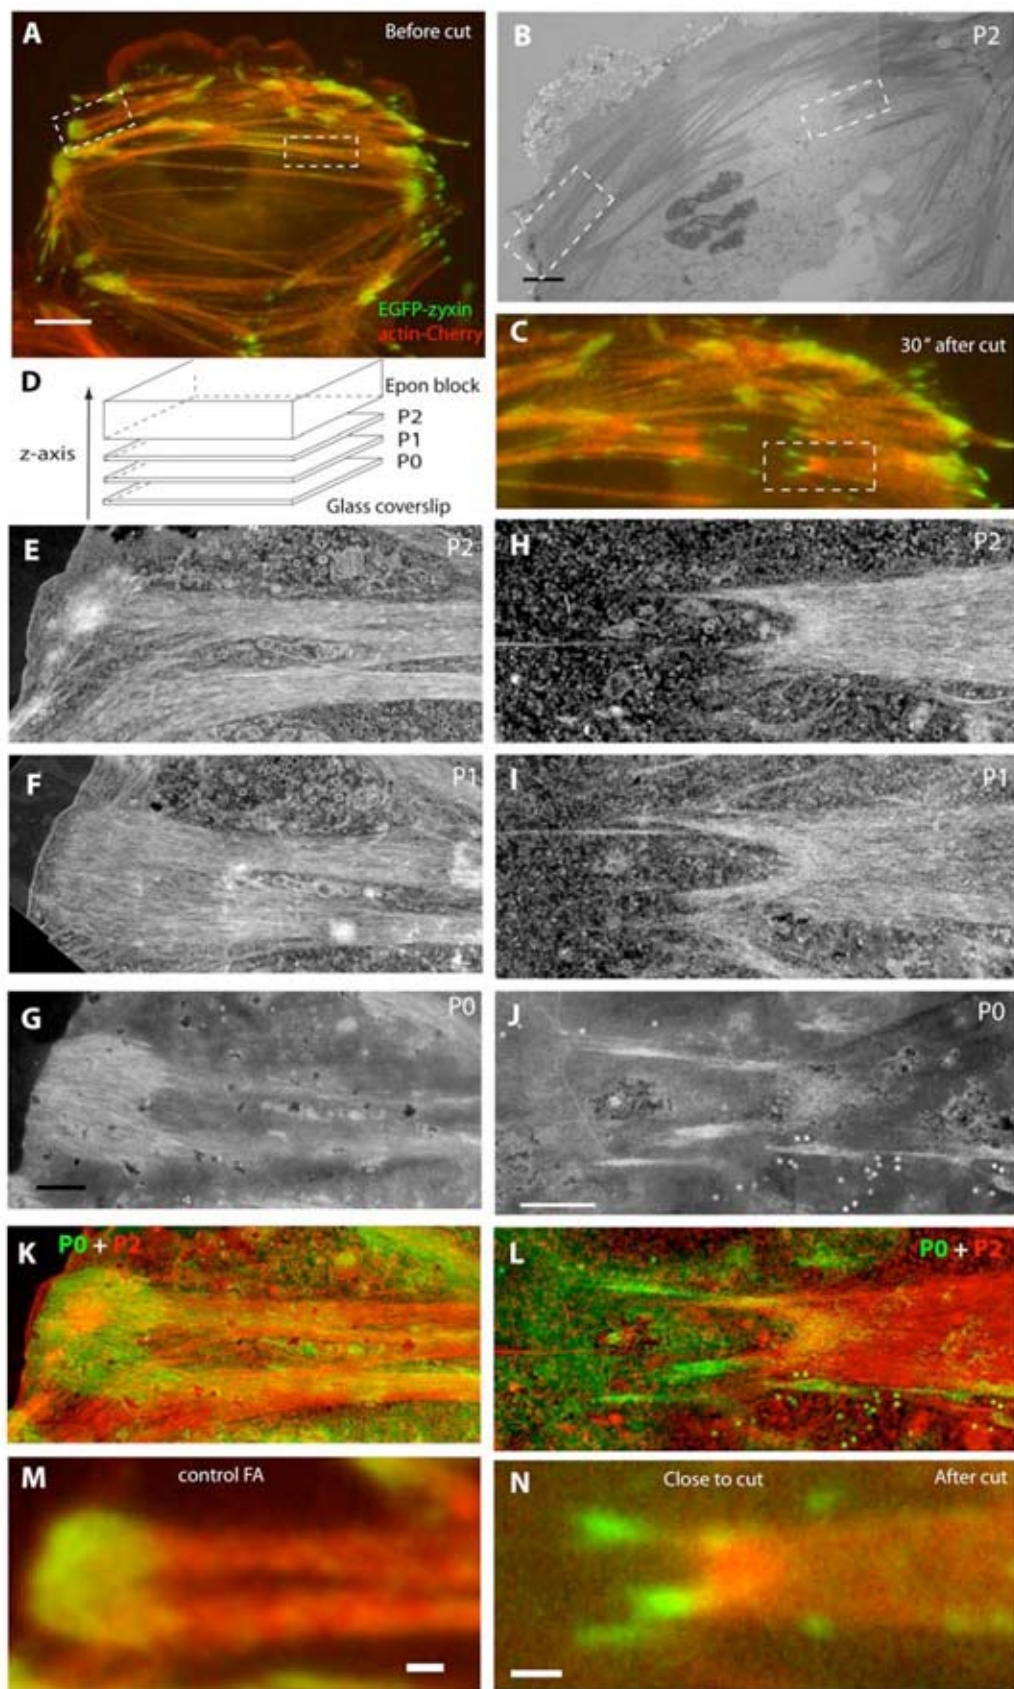

Supplement: jcs042986-sup-042986-figs2.pdf [file jcs042986-sup-042986-figs2.pdf]

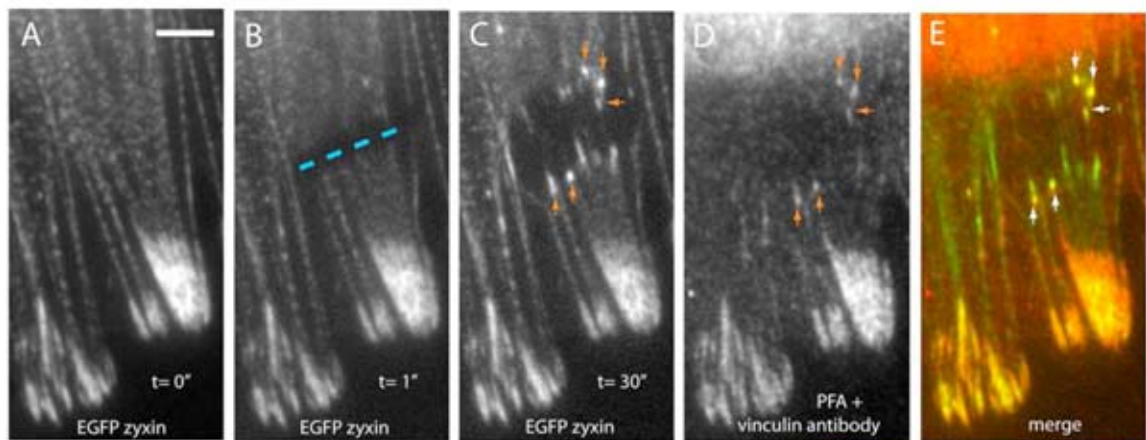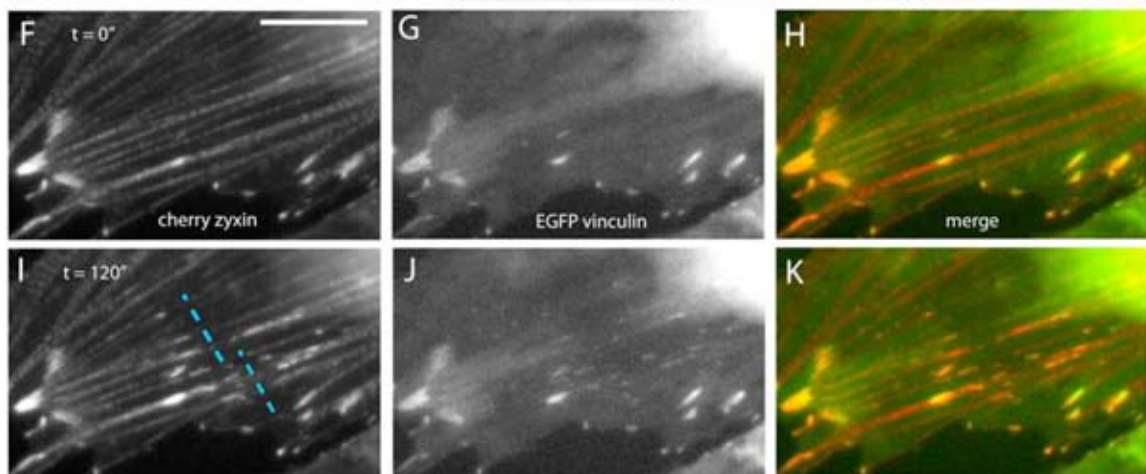

Supplement: jcs042986-sup-042986-figs3.pdf [file jcs042986-sup-042986-figs3.pdf]

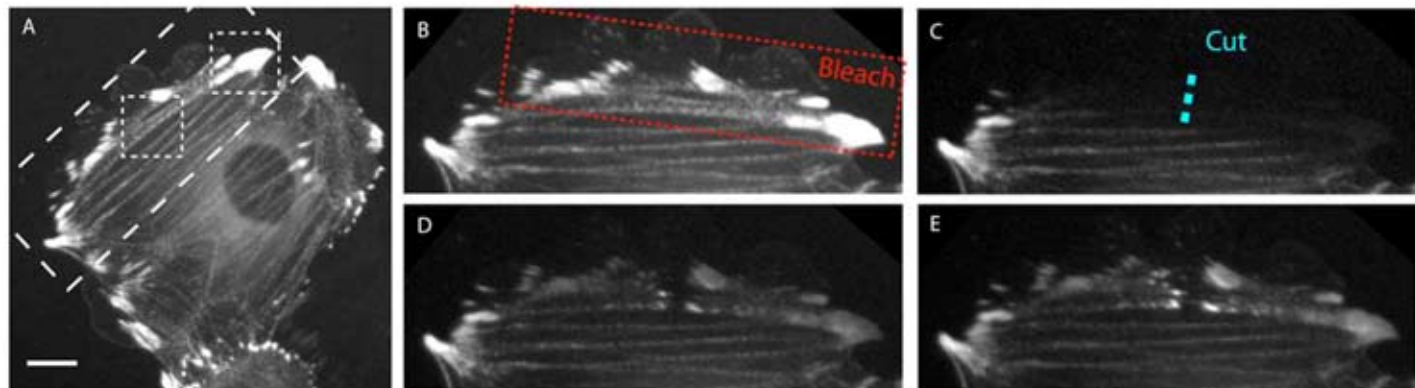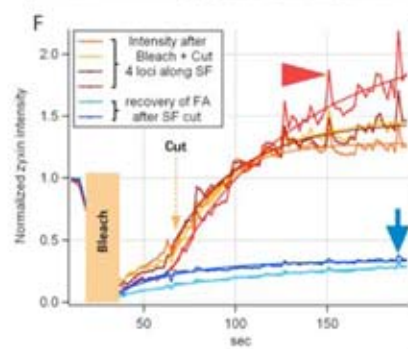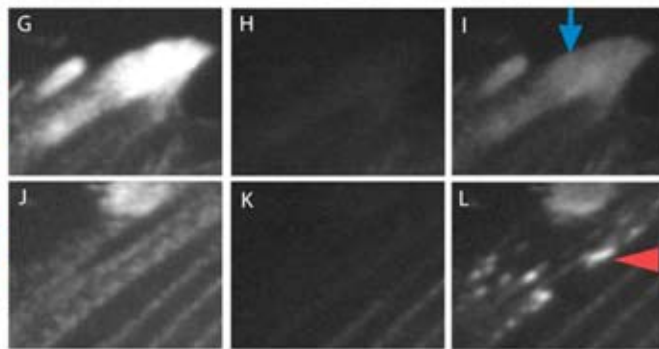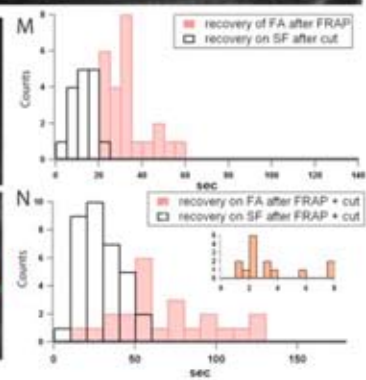

Supplement: jcs042986-sup-042986-figs4.pdf [file jcs042986-sup-042986-figs4.pdf]

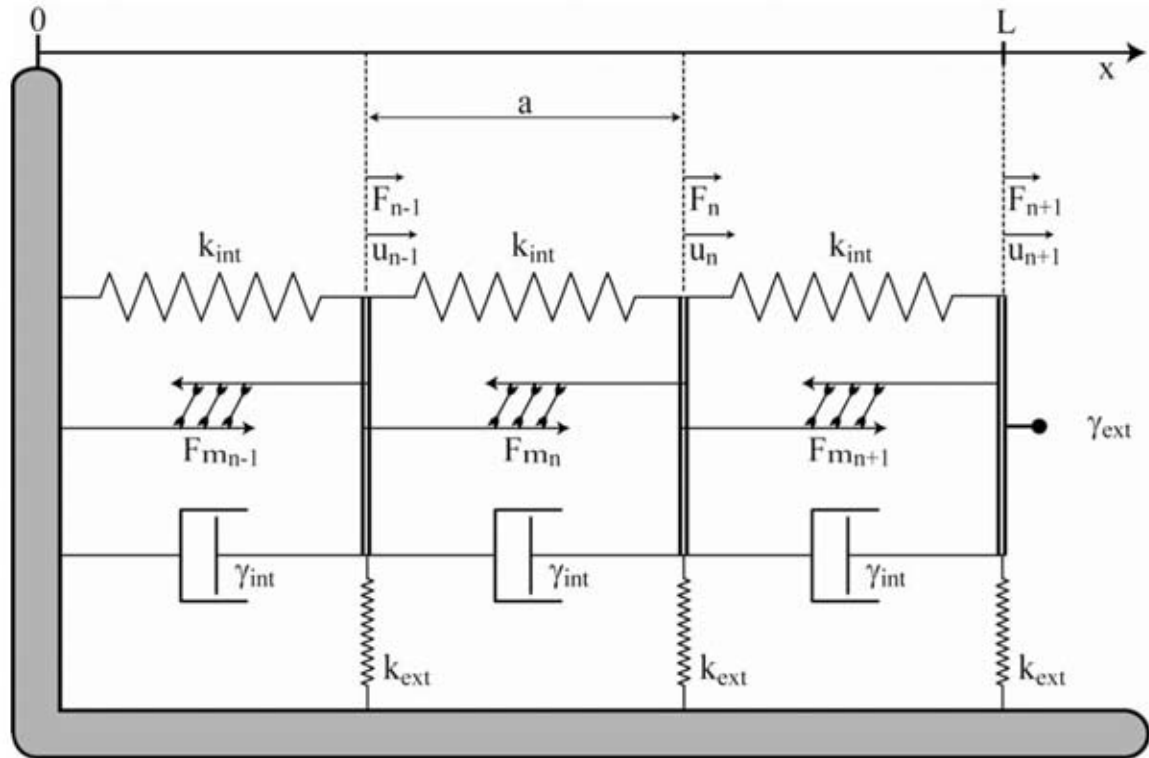

Supplement: jcs042986-sup-042986-figs5.pdf [file jcs042986-sup-042986-figs5.pdf]

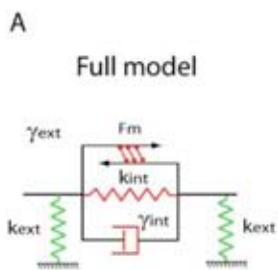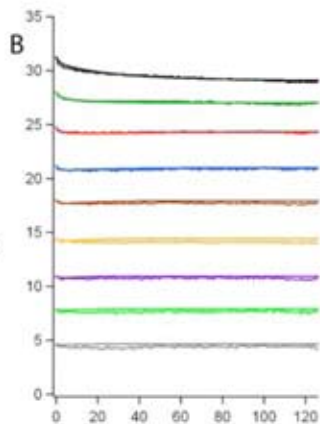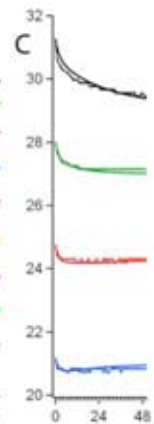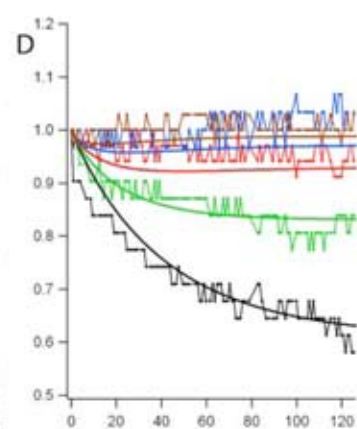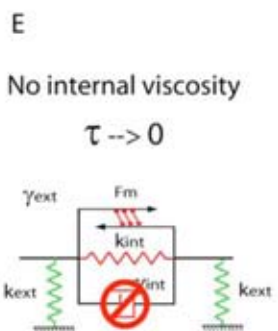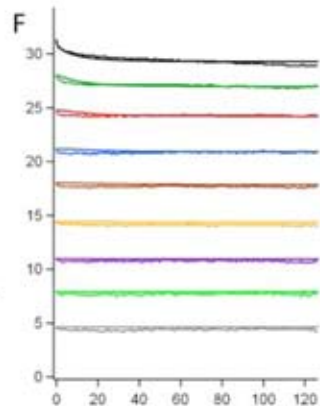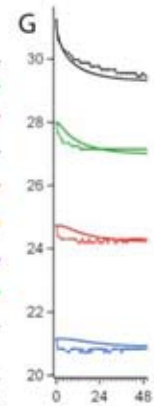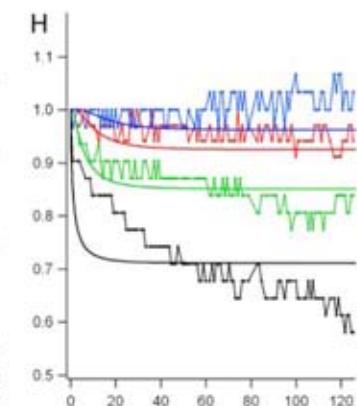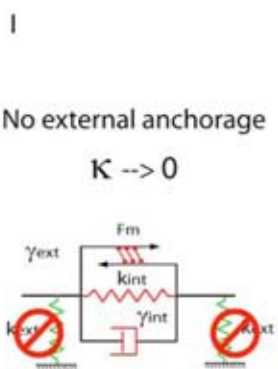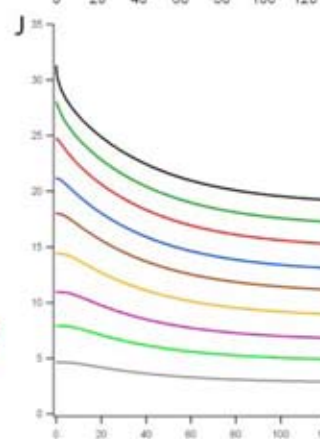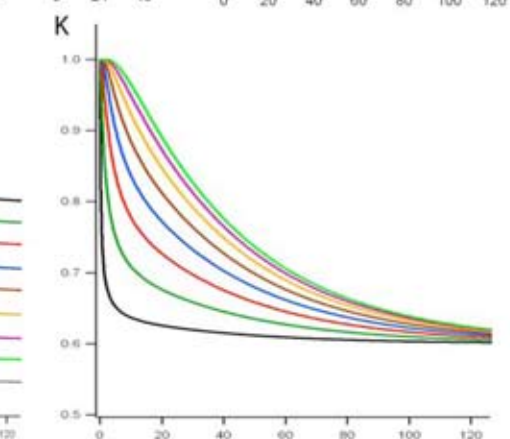

Supplement: jcs042986-sup-042986-figs6.pdf [file jcs042986-sup-042986-figs6.pdf]
